# Supplementary material for: TTBK2 circular RNA promotes glioma malignancy by regulating miR-217/HNF1β/Derlin-1 pathway
Source: J Hematol Oncol. 2017 Feb 20;10:52. doi: 10.1186/s13045-017-0422-2 (PMC5319142; doi:10.1186/s13045-017-0422-2)
Supplement: Additional file 4: — Primers used for chromatin immunoprecipitation assay. (XLSX 9 kb) [file 13045_2017_422_MOESM4_ESM.xlsx]

## Sheet: Sheet1
Derlin-1 PCR1
Forward primer	TAGCCATCTGTCCTCACACTG
Reverse primer	TGGTACCCTCTCTCCTGATCT
Product length	166
Derlin-1 PCR2
Forward primer	GGCTGTATCAATTTATATTCCCACC
Reverse primer	ACAACATTTGGGAACCAATGGA
Product length	72
Control PCR3
Forward primer	ACTTTCCTTAGCCCTCCACC
Reverse primer	TCCCTCTACTACCACCACCATT
Product length	103
